# Supplementary material
Source: PubMed Central journal article supplement (PMC6322651)
Supplement: NIHMS80948-supplement-Supplementary_Information.pdf [file NIHMS80948-supplement-Supplementary_Information.pdf]

# Supplementary Information: Atomic Iron and Titanium in the Atmosphere of an Exoplanet

H. Jens Hoeijmakers<sup>1,2</sup>, David Ehrenreich<sup>1</sup>, Kevin Heng<sup>2,7</sup>, Daniel Kitzmann<sup>2</sup>, Simon L. Grimm<sup>2</sup>, Romain Allart<sup>1</sup>, Russell Deitrick<sup>2</sup>, Aurélien Wyttenbach<sup>1</sup>, Maria Oreshenko<sup>2</sup>, Lorenzo Pino<sup>1</sup>, Paul B. Rimmer<sup>3,4</sup>, Emilio Molinari<sup>5,6</sup>, Luca Di Fabrizio<sup>5</sup>

**1:** Observatoire astronomique de l'Université de Genève, 51 chemin des Maillettes, 1290 Versoix, Switzerland

**2:** University of Bern, Center for Space and Habitability, Gesellschaftsstrasse 6, CH-3012, Bern, Switzerland

**3:** University of Cambridge, Cavendish Astrophysics, JJ Thomson Ave, Cambridge CB3 0HE, United Kingdom

**4:** MRC Laboratory of Molecular Biology, Francis Crick Ave, Cambridge CB2 0QH, United Kingdom

**5:** INAF FGG, Telescopio Nazionale Galileo, Rambla José Ana Fernández Pérez, 7, 38712 Breña Baja, TF - Spain

**6:** INAF Osservatorio Astronomico di Cagliari, Via della Scienza 5 - 09047 Selargius CA, Italy

**7:** Corresponding author: kevin.heng@csh.unibe.ch

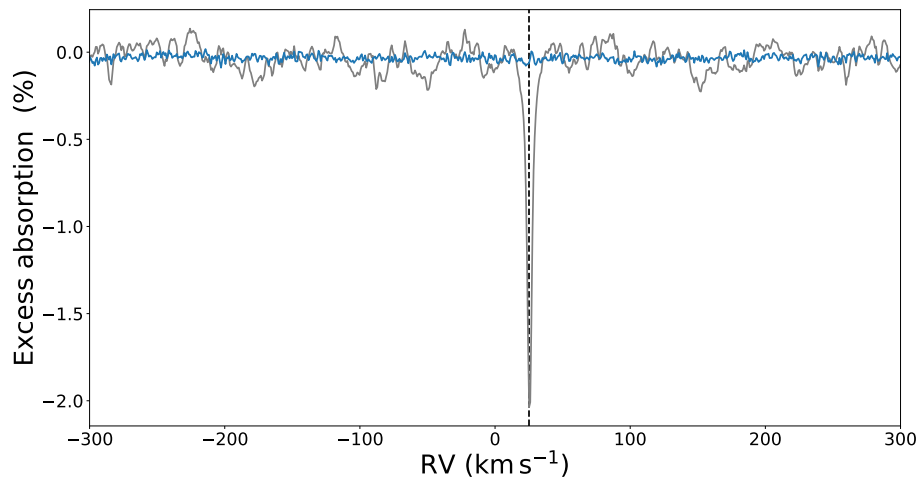

Supplementary Figure 1: Cross correlation analysis performed on the in-transit spectrum with a telluric water-absorption template spectrum (at 296 K). The blue and grey curves are the transit depths with and without the telluric correction, respectively. The data are shifted to the rest frame of the star, such that the signal dominated by telluric water absorption occurs near  $+25 \text{ km s}^{-1}$  (corresponding to the Barycentric Earth Radial Velocity or BERV systemic velocity), as indicated by the dashed vertical line.

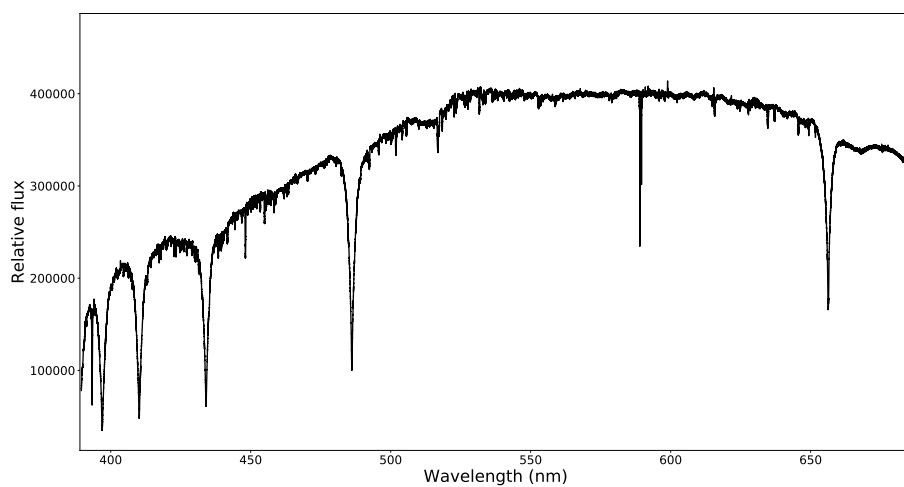

Supplementary Figure 2: HARPS-N spectrum of the KELT-9 system.

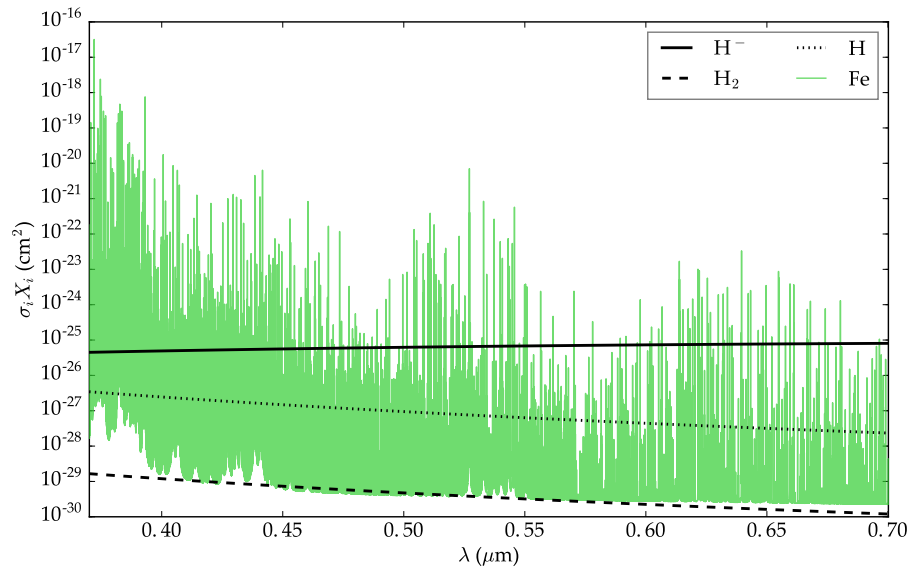

Supplementary Figure 3: Weighted cross sections of neutral atomic iron, Rayleigh scattering due to atomic and molecular hydrogen, and absorption by hydrogen anions.

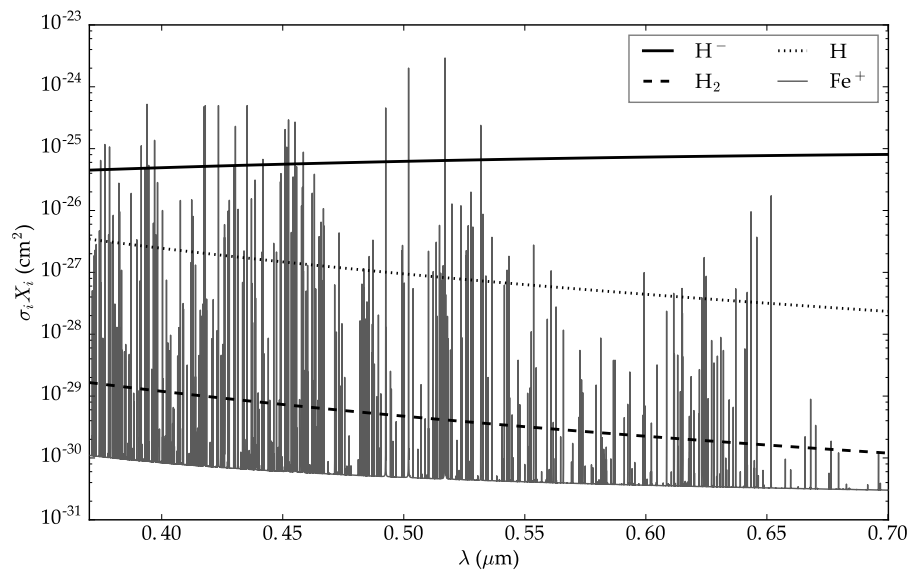

Supplementary Figure 4: Same as Figure 3, but for singly-ionized iron.

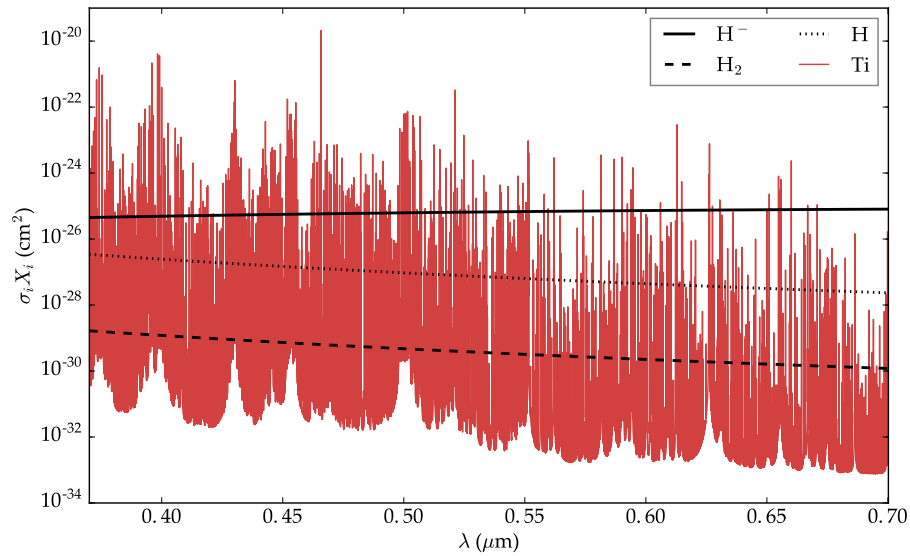

Supplementary Figure 5: Same as Figure 3, but for neutral atomic titanium.

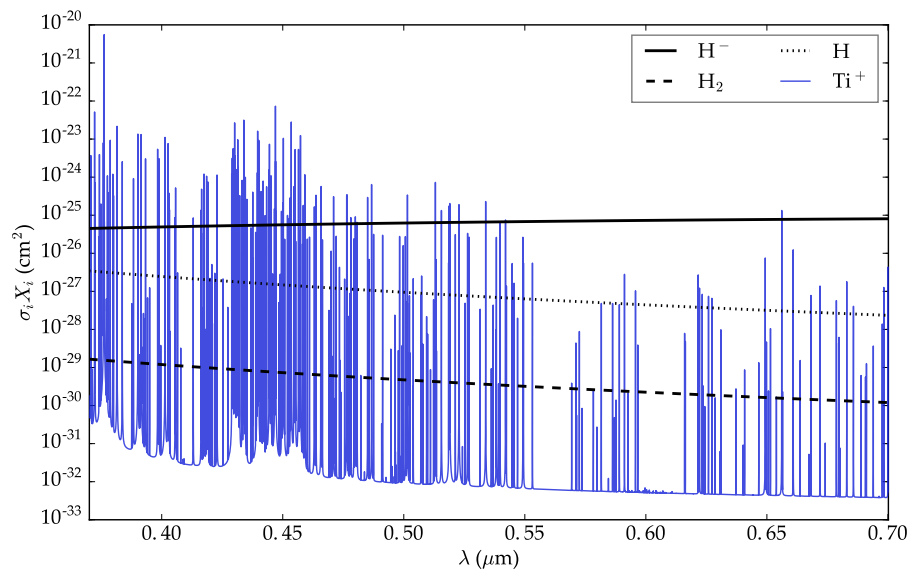

Supplementary Figure 6: Same as Figure 3, but for singly-ionized titanium.

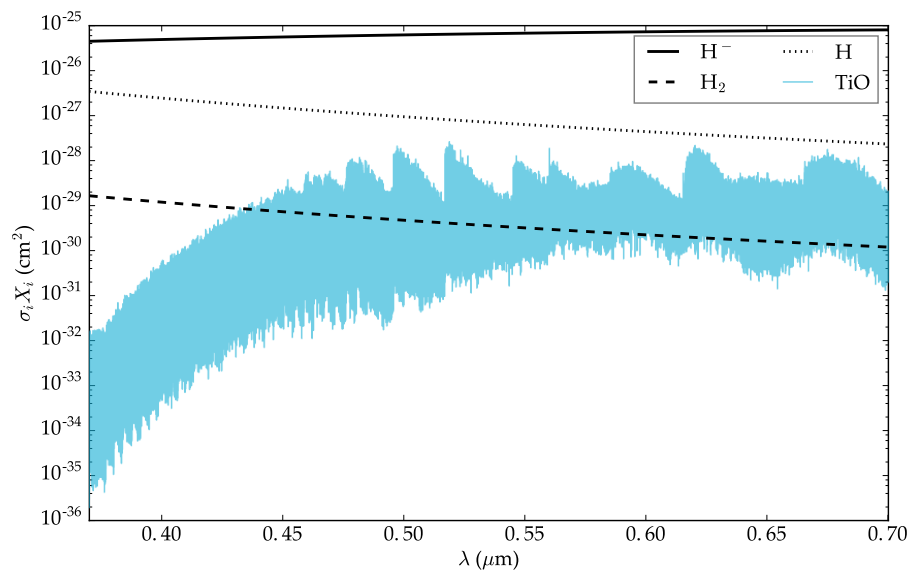

Supplementary Figure 7: Same as Figure 3, but for titanium oxide.
